# Supplementary material
Source: Springer Nature journal article supplement (https://www.springermedizin.de/resource/supplementary/12911_2010_389_MOESM6_ESM.pdf/9525626)
Supplement: MOESM6 [file 9525626]

**Change in percentage of patients achieving treatment targets**  
**Patient level analysis for enhanced versus standard provider report card sites**

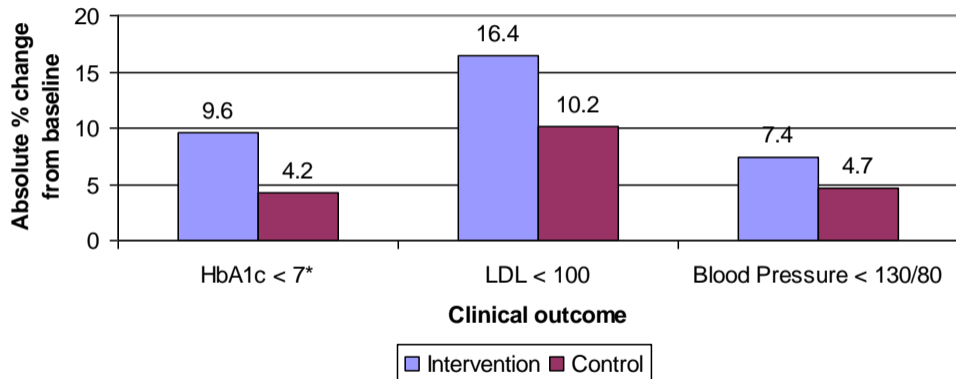

\* $p$ -value < 0.01
